# Supplementary material for: Effects of Co-Contamination of Microplastics and Cd on Plant Growth and Cd Accumulation
Source: Toxics. 2020 May 20;8(2):36. doi: 10.3390/toxics8020036 (PMC7356726; doi:10.3390/toxics8020036)
Supplement: Supplementary file 1 [file toxics-08-00036-s001.pdf]

# Supplementary Material: Effects of Co-contamination of Microplastics and Cd on Plant Growth and Cd Accumulation

Fayuan Wang, Xiaoqing Zhang, Shuqi Zhang, Shuwu Zhang, Catharine A. Adams and Yuhuan Sun

**Table 1.** BAI of Cd in maize plants exposed to MPs and Cd. Different letters following the mean values  $\pm$  SD ( $n = 4$ ) in the same column indicate significant differences using a one-way ANOVA followed by Duncan's multiple range test ( $p < 0.05$ ).

| MPs treatment |      | BAI              |                   |
|---------------|------|------------------|-------------------|
| Type          | Dose | Shoots           | Roots             |
| Control       | 0    | 3.91 $\pm$ 0.47a | 7.62 $\pm$ 0.55ab |
|               | 0.1% | 4.31 $\pm$ 0.36a | 8.95 $\pm$ 1.26a  |
| PE            | 1%   | 4.23 $\pm$ 1.54a | 6.66 $\pm$ 0.30b  |
|               | 10%  | 3.96 $\pm$ 0.76a | 8.61 $\pm$ 0.43a  |
|               | 0.1% | 4.22 $\pm$ 0.77a | 8.69 $\pm$ 1.68a  |
| PS            | 1%   | 4.34 $\pm$ 0.74a | 8.15 $\pm$ 1.45ab |
|               | 10%  | 3.73 $\pm$ 0.24a | 9.29 $\pm$ 1.27a  |
